# Supplementary material for: Donor–acceptor π-conjugated aggregation-induced emission molecules for reversible nanometer-scale data storage
Source: Royal Society of Chemistry journal article supplement (doi:10.1039/c6tc00803h), 2016-01-01
Supplement: c6tc00803h1.pdf [file c6tc00803h1.pdf]

## Supporting information:

### Donor-acceptor $\pi$ -conjugated aggregation-induced emission molecules for reversible nanometer-scale data storage

Shuhong Li\*,<sup>ab</sup> Yanli Shang,<sup>c</sup> Lifang Wang,<sup>a</sup> Ryan T. K. Kwok,<sup>b</sup> Ben Zhong Tang\*<sup>bde</sup>

<sup>a</sup> School of Science, Beijing Technology and Business University, Beijing 100048, China E-mail: lish@th.btbu.edu.cn

<sup>b</sup> Department of Chemistry, Division of Biomedical Engineering, Institute for Advanced Study, and Institute of Molecular Functional Materials, The Hong Kong University of Science and Technology (HKUST), Clear Water Bay, Kowloon, Hong Kong, China E-mail: tangbenz@ust.hk

<sup>c</sup> College of Chemistry and Environmental Science, Key Laboratory of Analytical Science and Technology of Hebei Province, Hebei University, Baoding, Hebei Province, 071002, P. R. China

<sup>d</sup> Guangdong Innovative Research Team, SCUT-HKUST Joint Research Laboratory, State Key Laboratory of Luminescent Materials and Devices, South China University of Technology (SCUT), Guangzhou 510640, China

<sup>e</sup> HKUST-Shenzhen Research Institute, Nanshan, Shenzhen 518057, China

## Experimental section

All experiments were carried out under a nitrogen atmosphere unless otherwise noted. TPE units were prepared by the similar procedure as previously reported<sup>[1]</sup>. All solvents were dried by normal procedure and distilled under an inert atmosphere before use. <sup>1</sup>H and <sup>13</sup>C NMR spectra were measured on a Bruker 400 MHz spectrometer. UV/Vis absorption spectra and fluorescence spectra measurement were performed at room temperature with a Varian 50Conc spectrometer and a PerkinElmer LS55 spectrometer, respectively. HRMS were determined on a Bruker Solarix 9.4 T mass spectrometer. The absolute fluorescent quantum yield was determined by a Hamamatsu Quantaurus-QY C11347 integrated sphere system. The single crystal X-ray diffraction measurement was performed at 173 K with a Rigaku Saturn 724+ CCD diffractometer equipped with a sealed tube MoK $\alpha$  radiation source.

*Synthetic route:*

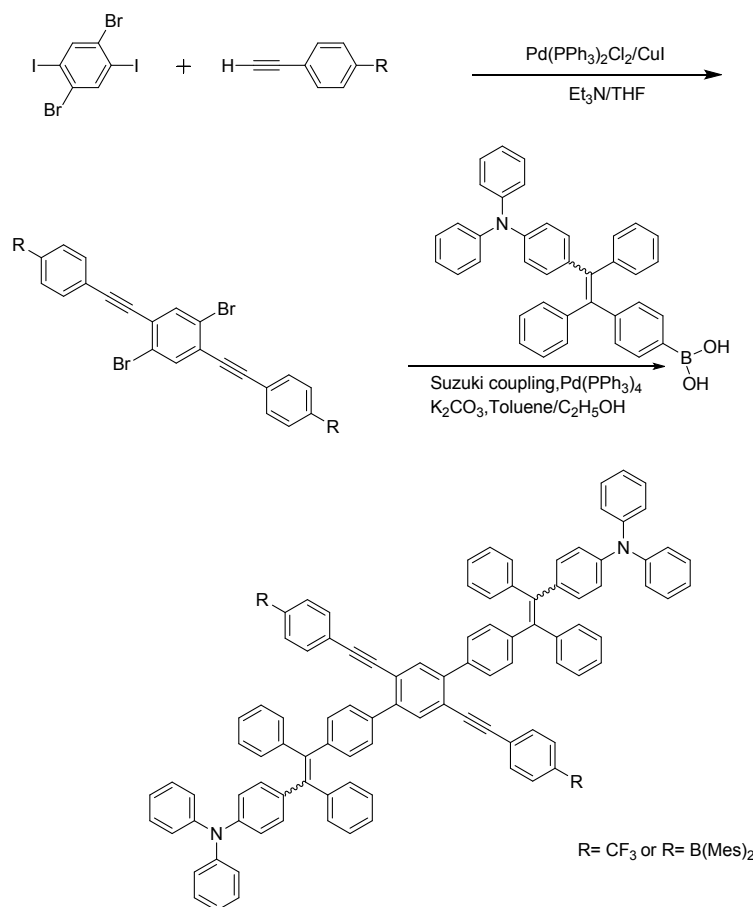

### Synthetic method

To a 50 mL flask was charged with 1,4-dibromo-2,5-diiodobenzene, Pd(PPh<sub>3</sub>)<sub>2</sub>Cl<sub>2</sub>, and CuI under N<sub>2</sub> atmosphere, then (4-ethynylphenyl)dimesitylborane or 1-ethynyl-4-(trifluoromethyl)benzene was added. The THF and Et<sub>3</sub>N mixture (3:1) were injected. The mixture was stirred at r.t. for 10h. After concentrated, NH<sub>4</sub>Cl solution (10 mL) was added and the mixture was extracted with dichloromethane. The combined organic layers were washed with brine (20 mL), dried over MgSO<sub>4</sub>, filtered, and concentrated under reduced pressure. The residue was purified by a silica gel column chromatography to afford the title compound in about 70-80% yield.

#### Compound 1

((((2,5-dibromo-1,4-phenylene)bis(ethyne-2,1-diyl))bis(4,1-phenylene))bis(dimesitylborane) reacted with (4-(2-(4-(diphenylamino)phenyl)-1,2-diphenylvinyl)phenyl)boronic acid under Pd(PPh<sub>3</sub>)<sub>4</sub>, and K<sub>2</sub>CO<sub>3</sub> in N<sub>2</sub> atmosphere, <sup>1</sup>H NMR (400 MHz, Chloroform-*d*<sub>6</sub>): 7.66 (t, *J* = 10 Hz, 2H), 7.52-7.36 (m, 8H), 7.24-6.97 (m, 46H), 6.92-6.76 (m, 18H), 2.32 (s, 12H), 2.00 (q, 24H); <sup>13</sup>C NMR (100 MHz, Chloroform-*d*<sub>6</sub>): 147.57, 147.52, 145.98, 144.06, 143.89, 143.60, 143.43, 142.20, 141.51, 141.09, 140.96, 140.77, 140.15, 140.02, 138.81, 137.93, 137.73, 137.01, 136.10, 133.52, 133.31, 132.18, 131.40, 131.00, 130.78, 130.74, 129.06, 128.60, 128.19, 127.69, 127.61, 126.57, 126.47, 126.34, 124.23, 124.20, 122.74, 122.65, 121.67, 121.44, 94.38, 94.22,

91.50, 23.42, 21.21; HRMS (MALDI), calcd. : C<sub>134</sub>H<sub>110</sub>B<sub>2</sub>N<sub>2</sub>: 1768.888315, Found: 1768.887398.

#### Compound 2

4,4'-(2,5-dibromo-1,4-phenylene)bis(ethyne-2,1-diyl)bis((trifluoromethyl)benzene) reacted with (4-(2-(4-(diphenylamino)phenyl)-1,2-diphenylvinyl)phenyl)boronic acid under Pd(PPh<sub>3</sub>)<sub>4</sub>, and K<sub>2</sub>CO<sub>3</sub> in N<sub>2</sub> atmosphere,

<sup>1</sup>H NMR (400 MHz, Chloroform-*d*<sub>6</sub>): 7.70(t, *J*=10Hz, 2H), 7.56-7.45(m, 8H), 7.37-7.33(m, 4H), 7.24-7.09(m, 42H), 6.95-6.88(m, 6H), 6.82-6.77(m, 4H); <sup>13</sup>C NMR (100 MHz, Chloroform-*d*<sub>6</sub>): 147.72, 147.64, 146.28, 144.28, 143.96, 143.83, 143.64, 143.49, 142.95, 142.82, 142.46, 141.46, 141.30, 140.12, 140.03, 137.87, 137.75, 137.13, 136.93, 133.88, 133.75, 132.60, 132.33, 131.73, 131.71, 131.62, 131.57, 131.52, 131.24, 131.01, 130.20, 129.92, 129.28, 128.94, 128.71, 127.84, 127.04, 126.70, 126.60, 125.41, 124.49, 124.43, 122.97, 122.89, 122.83, 122.58, 121.66, 121.44, 92.66, 91.68; HRMS (MALDI), calcd. : C<sub>100</sub>H<sub>66</sub>F<sub>6</sub>N<sub>2</sub>: 1408.512471, Found: 1408.511854.

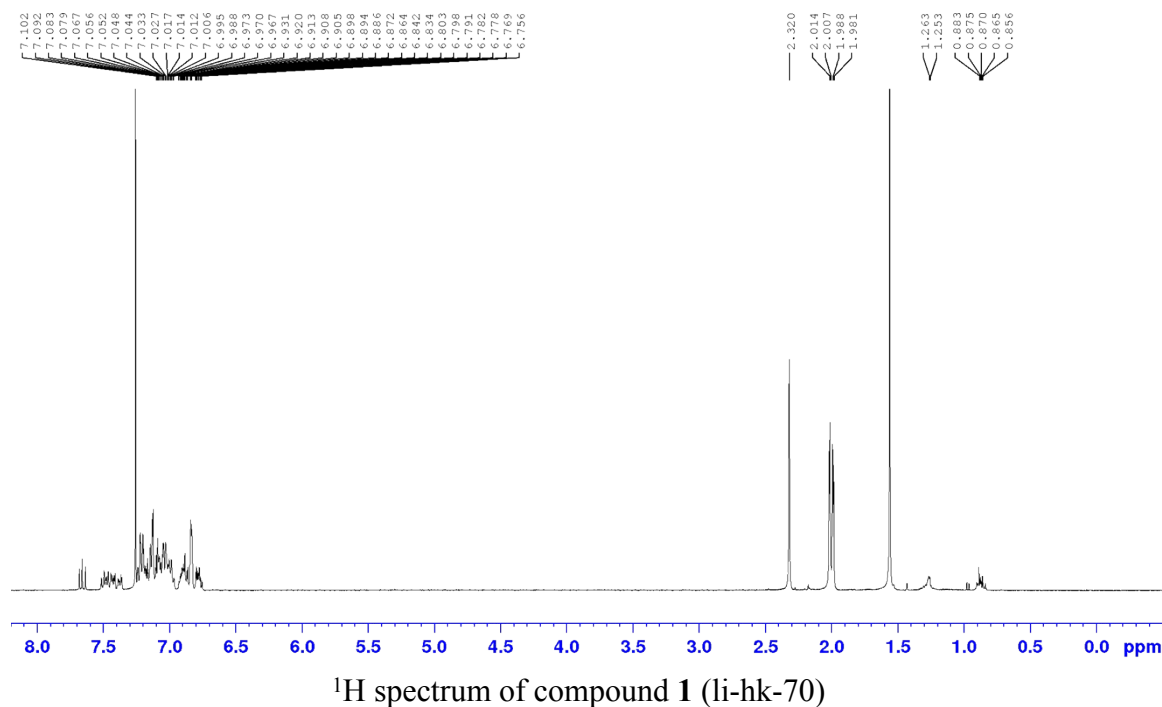

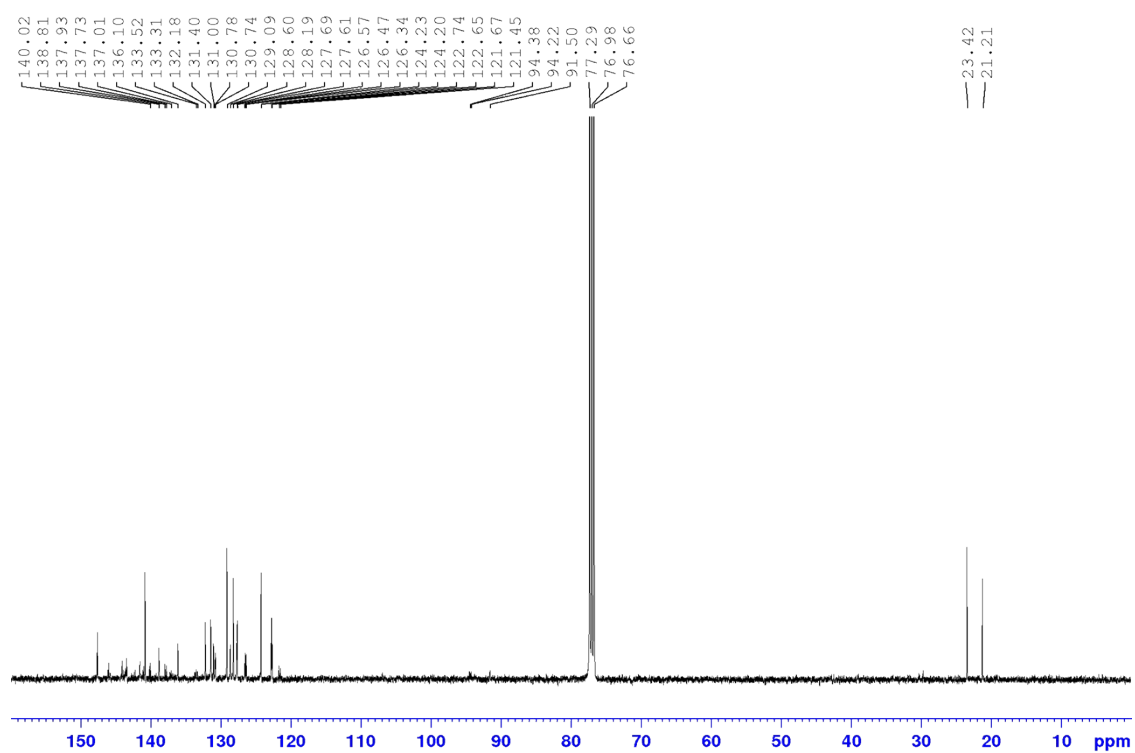

$^{13}\text{C}$  spectrum of compound 1 (li-hk-70)

# MALDI,LI-HK-70,20151224

## Analysis Info

Analysis Name D:\Data\MALDI\2015\1224\LI-HK-70\_0\_K1\_000004.d  
Method MALDI\_P\_100-3000  
Sample Name  
Comment

Acquisition Date 12/24/2015 4:41:07 PM

Operator  
Instrument solariX

## Acquisition Parameter

|                       |            |                      |           |                       |                          |
|-----------------------|------------|----------------------|-----------|-----------------------|--------------------------|
| Acquisition Mode      | Single MS  | Acquired Scans       | 5         | Calibration Date      | Thu Dec 24 04:38:36      |
| Polarity              | Positive   | No. of Cell Fills    | 1         | Data Acquisition Size | 2048576                  |
| Broadband Low Mass    | 202.1 m/z  | No. of Laser Shots   | 10        | Data Processing Size  | 2097152                  |
| Broadband High Mass   | 2650.0 m/z | Laser Power          | 29.6 lp   | Apodization           | Sine-Bell Multiplication |
| Source Accumulation   | 0.001 sec  | Laser Shot Frequency | 0.020 sec |                       |                          |
| Ion Accumulation Time | 0.300 sec  |                      |           |                       |                          |

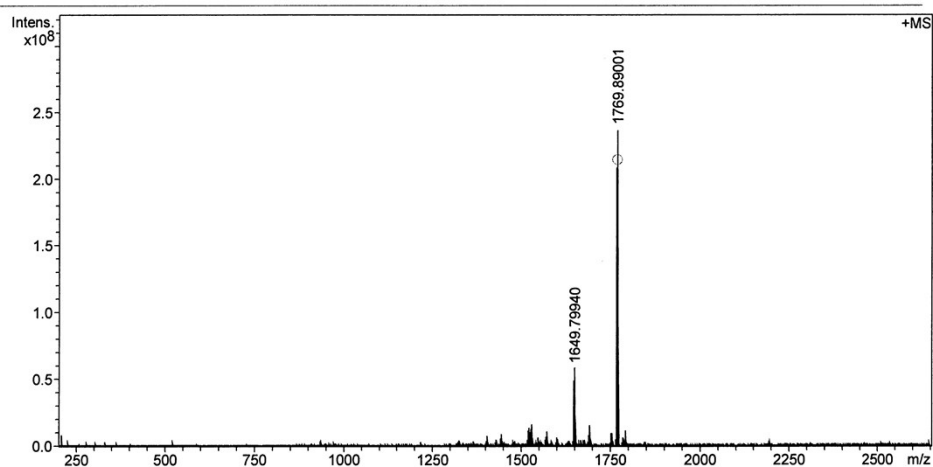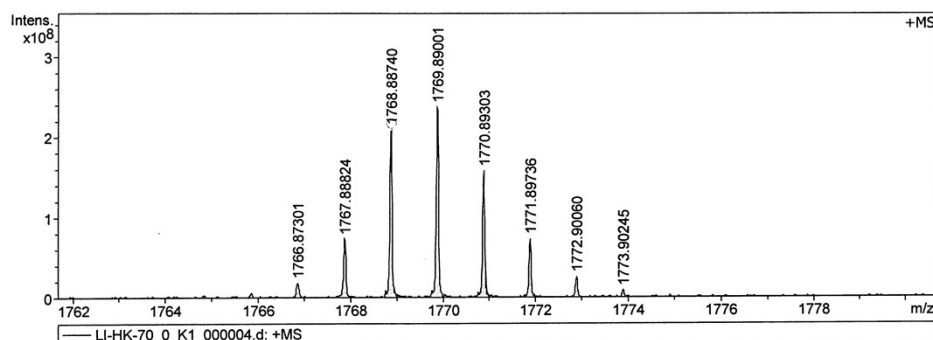

| Meas. m/z   | # | Ion Formula  | Score  | m/z         | Mean err [ppm] | mSigma | rdb  | e <sup>-</sup> Conf | N-Rule |
|-------------|---|--------------|--------|-------------|----------------|--------|------|---------------------|--------|
| 1768.887396 | 1 | C134H110B2N2 | 100.00 | 1768.888315 | 0.4            | 18.2   | 82.0 | odd                 | ok     |

HRMS of compound 1 (li-hk-70)

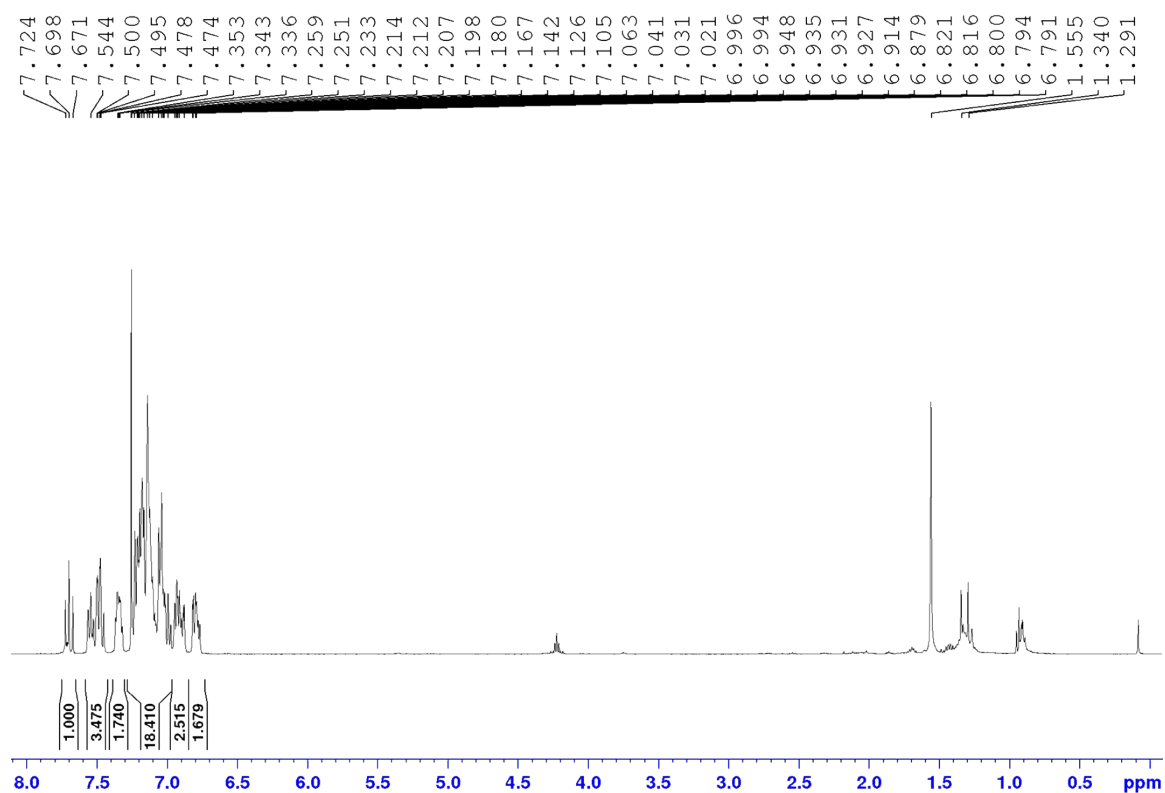

<sup>1</sup>H spectrum of compound 2 (li-hk-74)

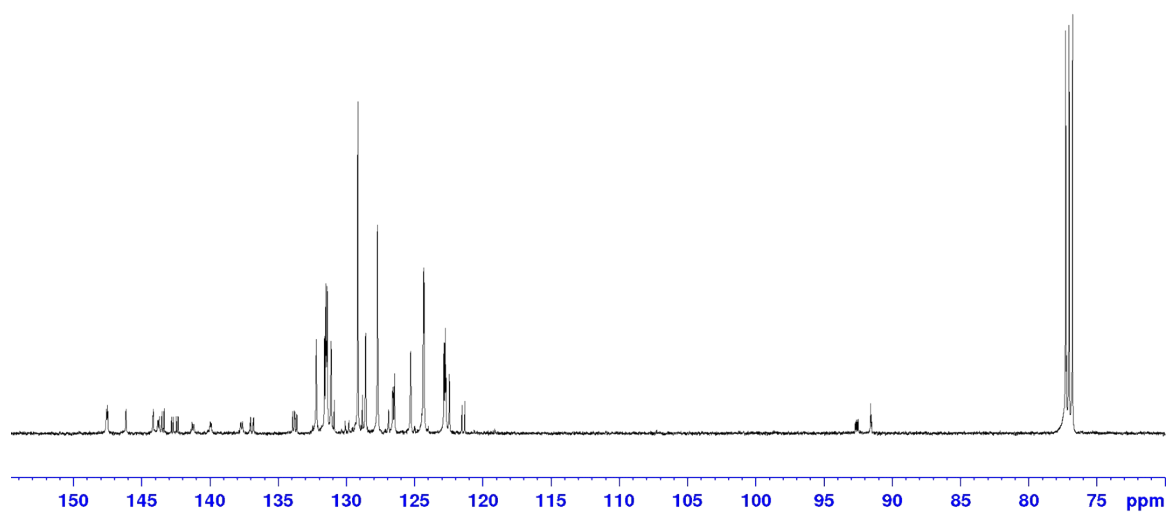

<sup>13</sup>C spectrum of compound 2 (li-hk-74)

# MALDI,LI-HK-74,20151224

## Analysis Info

Analysis Name D:\Data\MALDI\20151224\LI-HK-74\_0\_K2\_000003.d  
Method MALDI\_P\_100-3000  
Sample Name  
Comment

Acquisition Date 12/24/2015 4:52:46 PM

Operator  
Instrument solariX

## Acquisition Parameter

|                       |            |                      |           |                       |                          |
|-----------------------|------------|----------------------|-----------|-----------------------|--------------------------|
| Acquisition Mode      | Single MS  | Acquired Scans       | 5         | Calibration Date      | Thu Dec 24 04:38:36      |
| Polarity              | Positive   | No. of Cell Fills    | 1         | Data Acquisition Size | 2095152                  |
| Broadband Low Mass    | 202.1 m/z  | No. of Laser Shots   | 10        | Data Processing Size  | 4194304                  |
| Broadband High Mass   | 2650.0 m/z | Laser Power          | 23.2 lp   | Apodization           | Sine-Bell Multiplication |
| Source Accumulation   | 0.001 sec  | Laser Shot Frequency | 0.020 sec |                       |                          |
| Ion Accumulation Time | 0.300 sec  |                      |           |                       |                          |

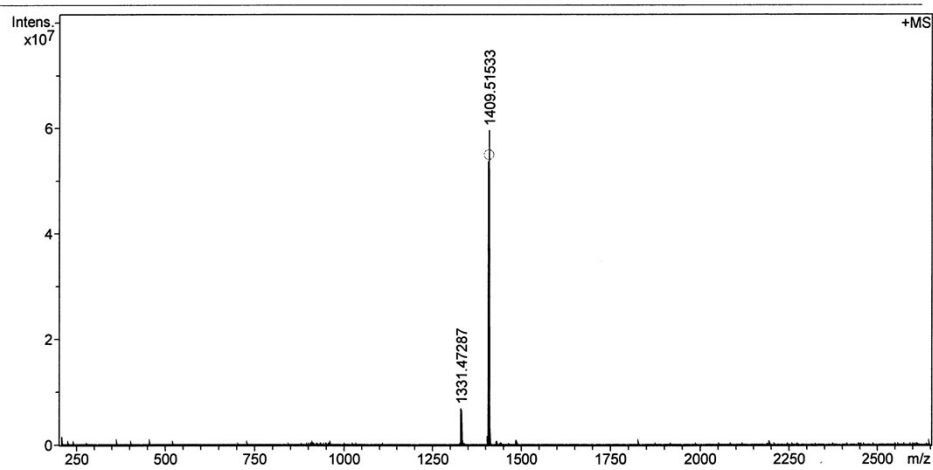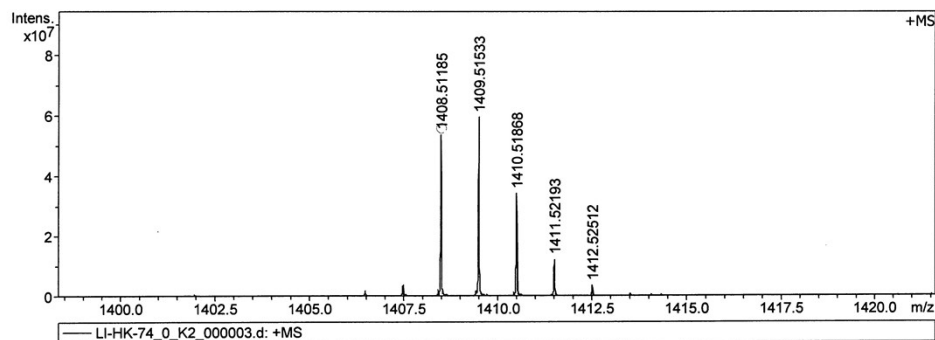

| Meas. m/z   | # | Ion Formula                                                    | Score  | m/z         | Mean err [ppm] | mSigma | rdb  | e <sup>-</sup> Conf | N-Rule |
|-------------|---|----------------------------------------------------------------|--------|-------------|----------------|--------|------|---------------------|--------|
| 1408.511854 | 1 | C <sub>100</sub> H <sub>66</sub> F <sub>6</sub> N <sub>2</sub> | 100.00 | 1408.512471 | 0.4            | 15.7   | 66.0 | odd                 | ok     |

HRMS of compound 2 (li-hk-74)

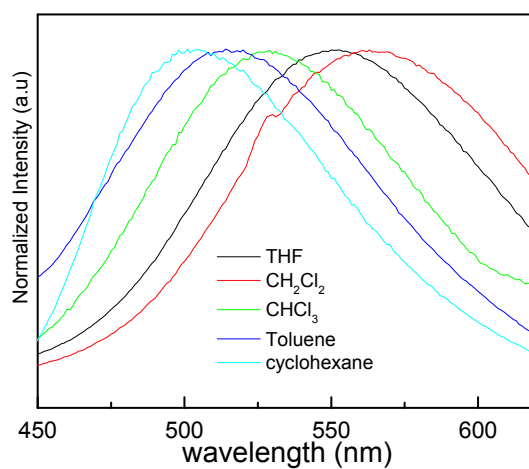

Sup. 2 Fluorescent spectra of the compound **2** in different solvents ( $\lambda_{\text{ex.}} = 370 \text{ nm}$ )

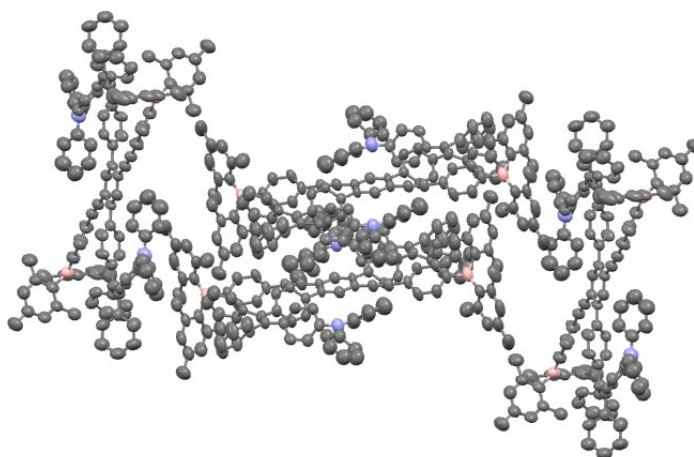

Sup.3 The single crystal packing mode of compound **1** shows that the donating triphenylamine group of one molecule can easily interact with the dimesitylboryl group of neighboring molecule.

#### Reference

- (1) J. Zhou, Z. Chang, Y. Jiang, B. He, M. Du, P. Lu, Y. N. Hong, H. S. Kwok, A. Qin, H. Qiu, Z. Zhao, B.Z. Tang, Chem. Comm.. 2013, 49, 2491.
